# Supplementary material for: Single-cell RNA sequencing reveals molecular and functional platelet bias of aged haematopoietic stem cells
Source: PubMed Central journal article supplement (PMC4820843; doi:10.1038/ncomms11075), 2016-03-24
Supplement: ncomms11075-s1.pdf [file ncomms11075-s1.pdf]

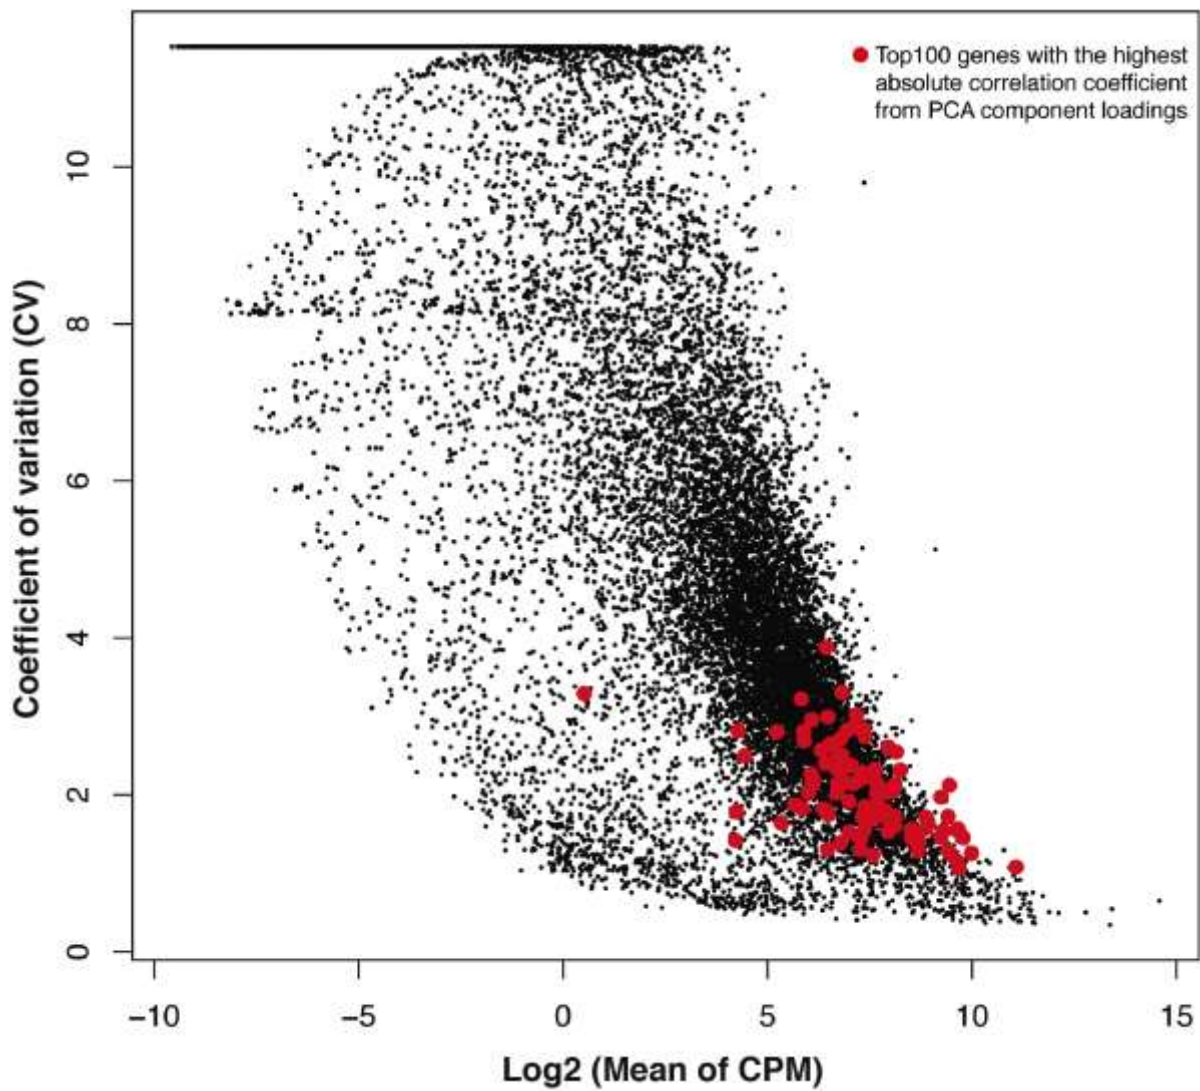

Supplementary Fig. 1: Expression level and variance of genes used for HSC clustering.

Scatter plot of CV versus mean expression for all detected genes over all cells in the dataset. Each dot represents a single gene. The 100 genes used for clustering are highlighted in red.

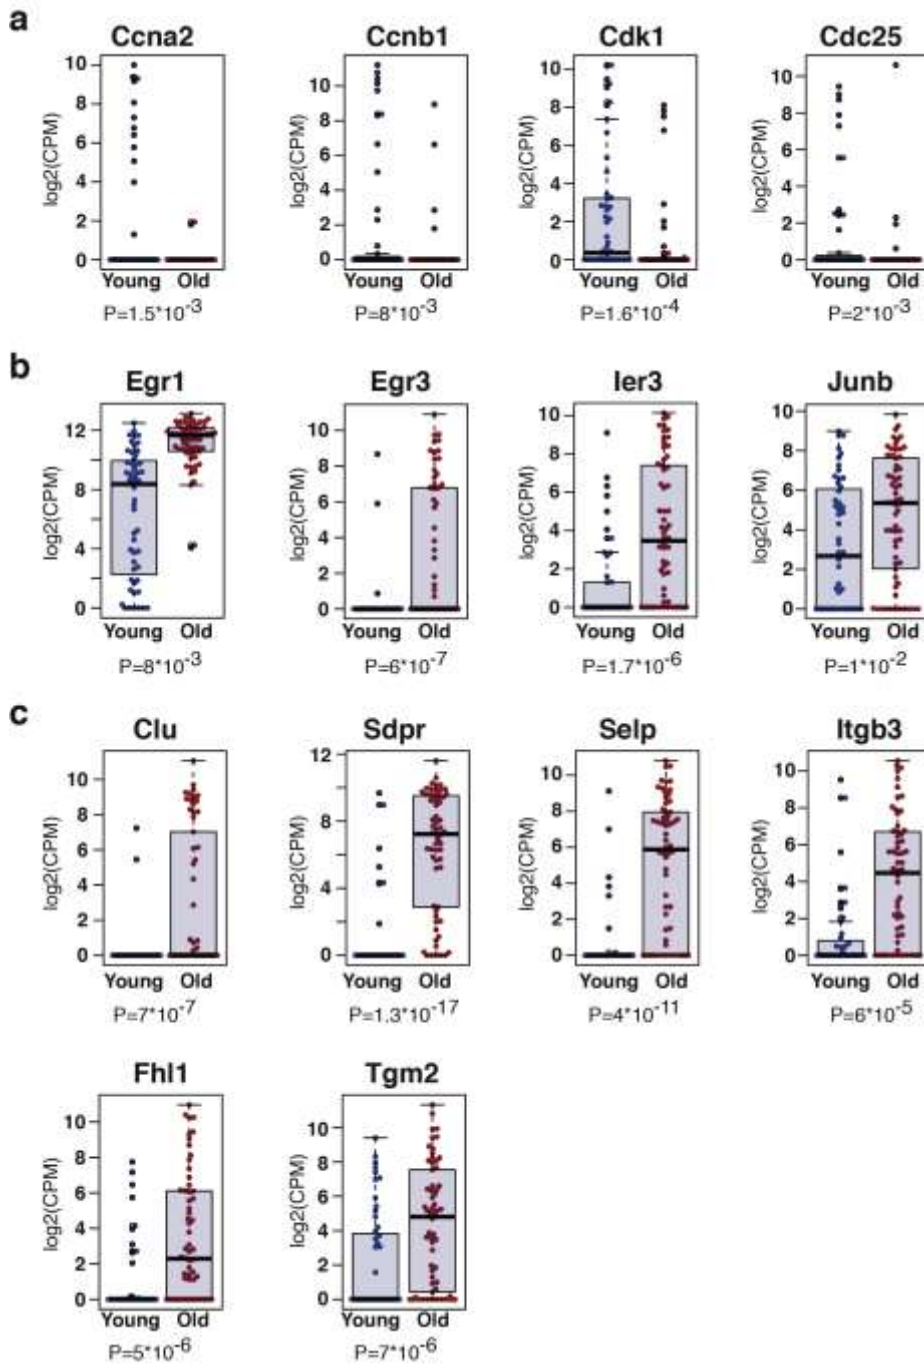

Supplementary Fig. 2: Gene expression in single HSCs.

**a)** Expression of key genes associated with mitosis program in single LSKCD150+CD48<sup>-</sup> LT-HSCs from Fig. 1a. Each circle represents a single HSC. A total of 52 young and 62 old LT-HSCs were profiled in two separate experiments. P-values for the difference in frequency with which each gene is expressed are shown (Fisher's exact test).

**b)** Expression of selected immediate-early genes analyzed as in (a).

**c)** Expression of selected platelet-lineage genes analyzed as in (a).

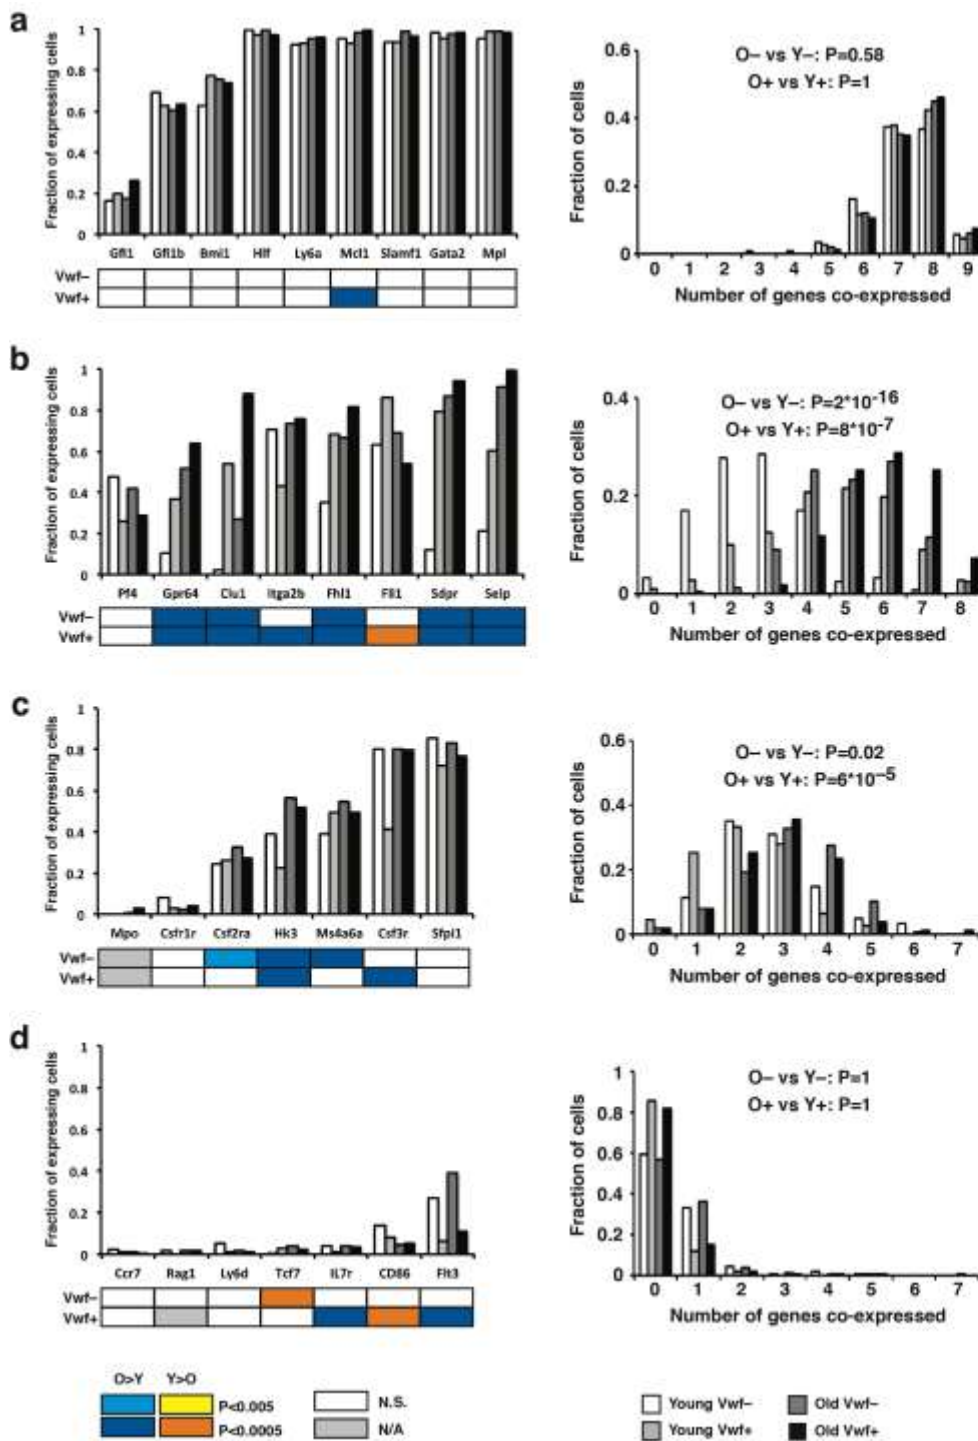

Supplementary Fig. 3: Stem cell and lineage associated gene expression in young and aged LT-HSCs.

a) Expression frequencies of individual genes within the HSC program in single Vwf<sup>+</sup> and Vwf<sup>-</sup> LT-HSCs, from young and old mice from **Fig. 2a**. The left histogram shows the frequency with which expression was detected for individual HSC-associated genes. The significance of any difference in expression frequency is indicated by the colored bars below (Chi-square test). The

right histogram shows the frequency of cells expressing a given number of HSC-associated genes, with the significance between young and aged populations determined using the Kolmogorov-Smirnov test. N.S.: not significant; N/A: not applicable (due to lack of expressing cells in one condition).

**b)** Analysis as in (a) of individual platelet lineage genes.

**c)** Analysis as in (a) of individual myeloid lineage genes.

**d)** Analysis as in (a) of individual lymphoid lineage genes.

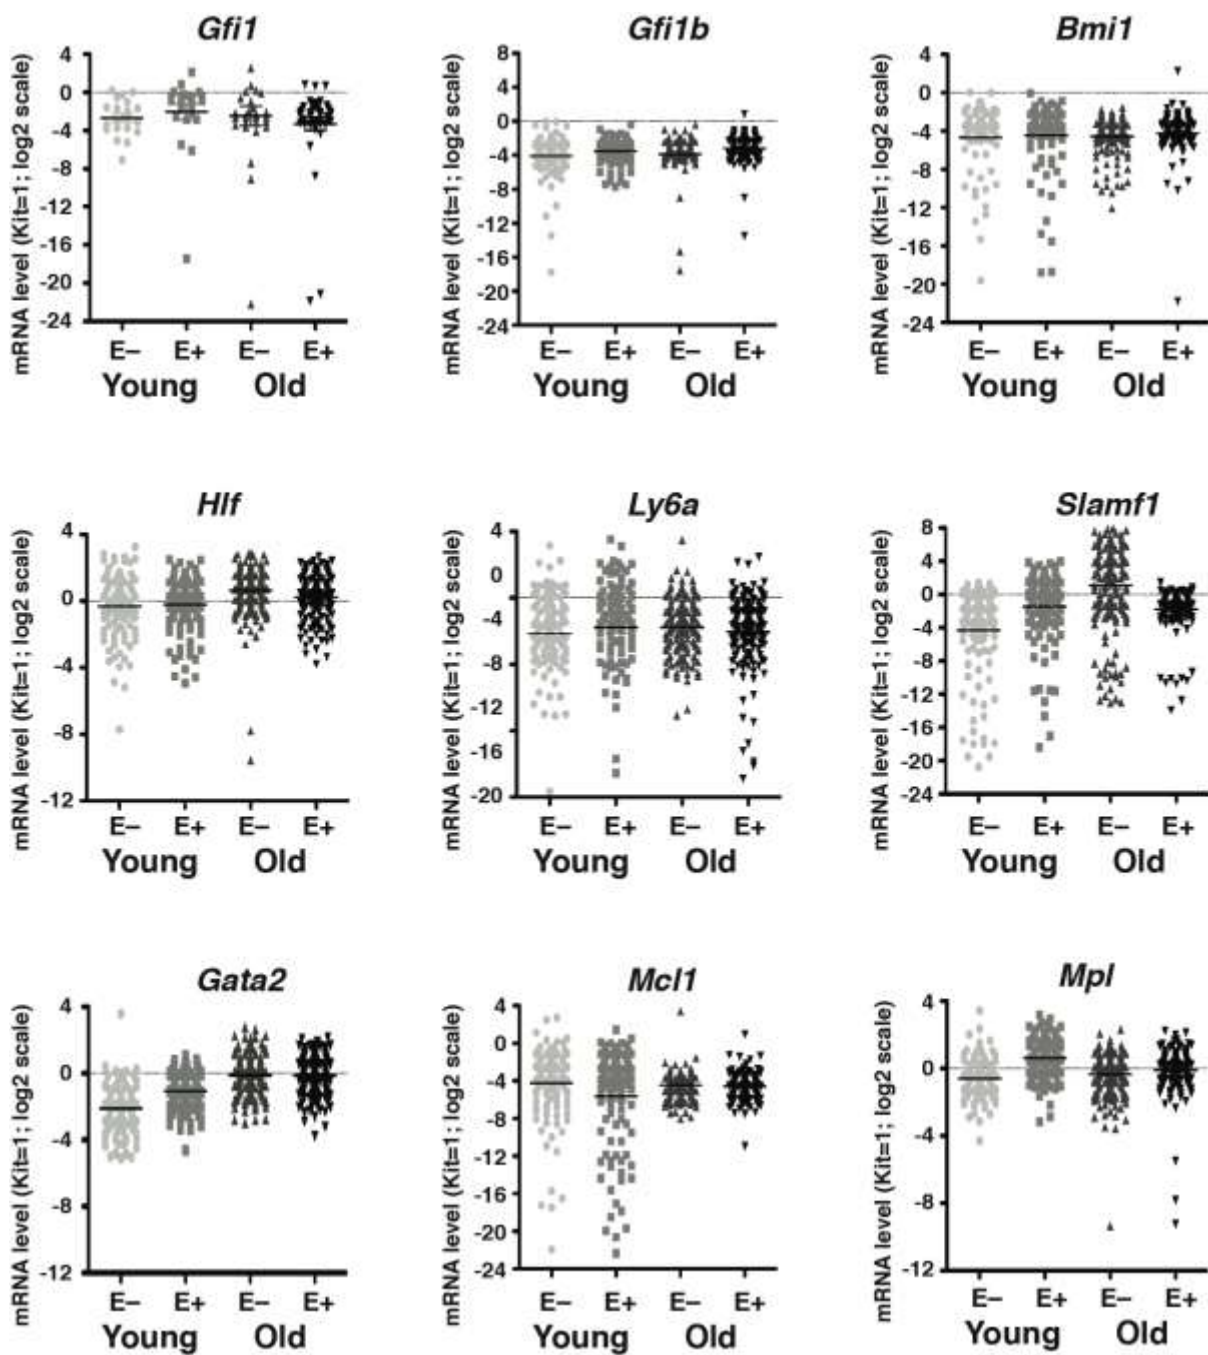

Supplementary Fig. 4: HSC gene expression levels in single LT-HSCs.

Expression levels of HSC-associated genes in single  $Vwf^{+}$  and  $Vwf^{-}$  LT-HSCs from young and old mice from **Fig. 2a**. Each data point represents the mRNA level in a single cell, normalized to *Kit* expression. Bars show the mean expression value and its standard deviation.

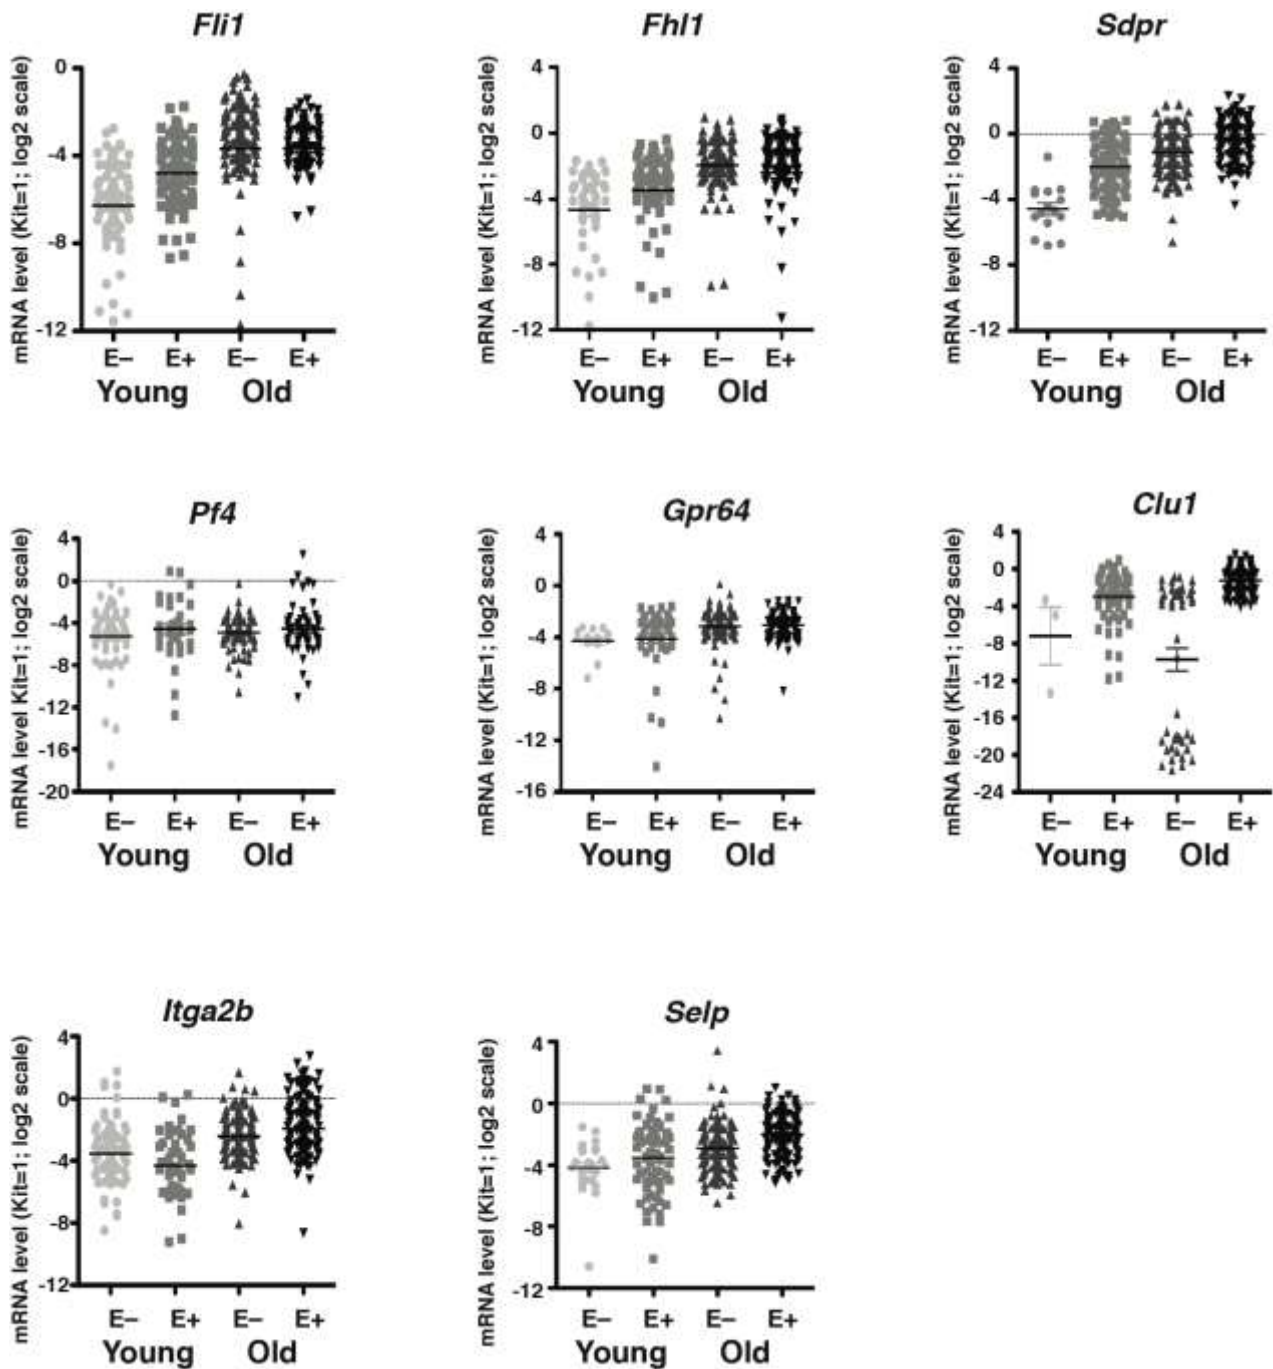

Supplementary Fig. 5: Platelet gene expression levels in single LT-HSCs.

Expression levels of the indicated platelet lineage genes in single  $Vwf^{+}$  and  $Vwf^{-}$  LT-HSCs, from young and old mice from **Fig. 2a**, presented as in Supplementary Fig. 3.

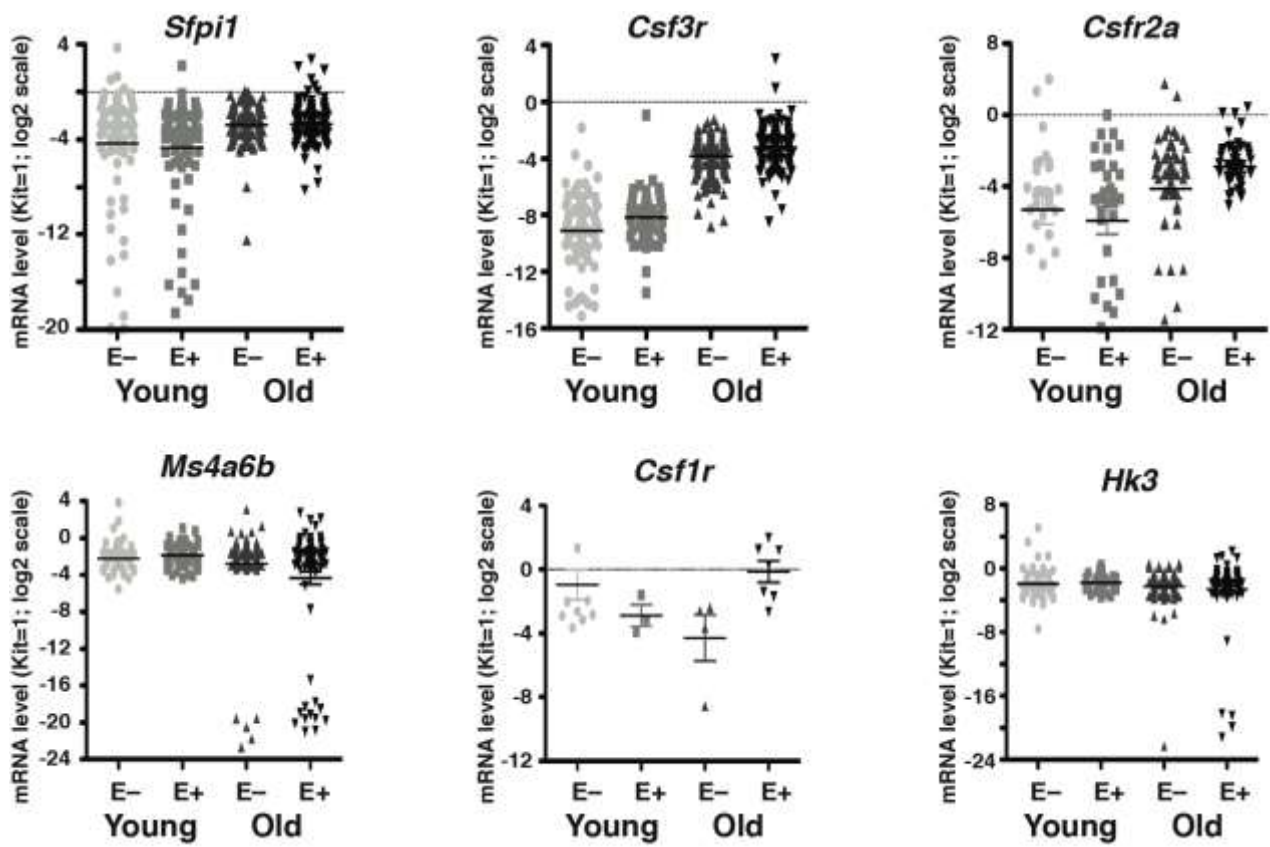

Supplementary Fig. 6: Myeloid gene expression levels in single LT-HSCs.

Expression levels of the indicated myeloid lineage genes in single  $Vwf^+$  and  $Vwf^-$  LT-HSCs, from young and old mice from **Fig. 2a**, presented as in Supplementary Fig. 3.

**a**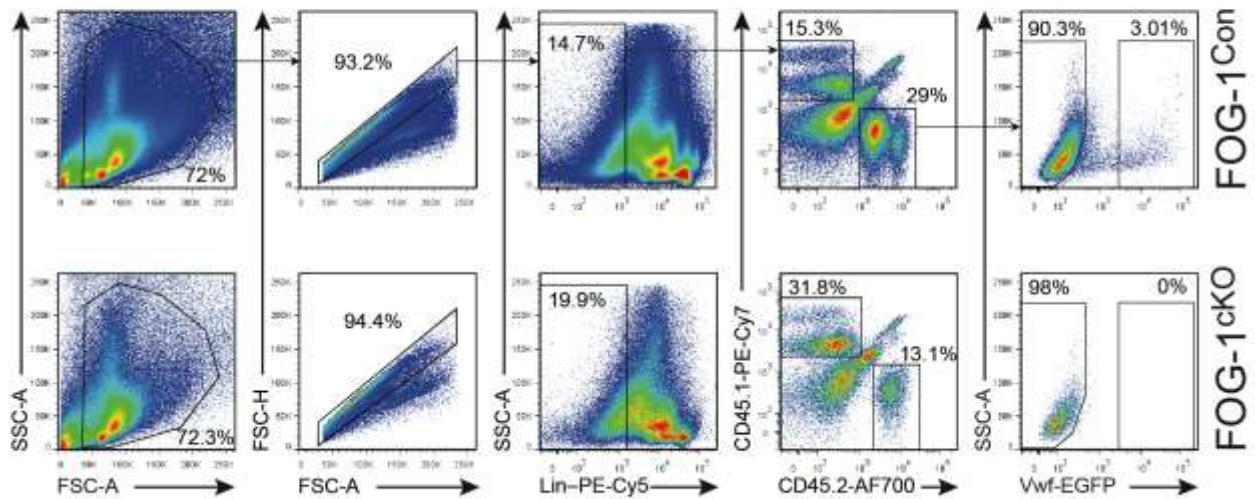**b**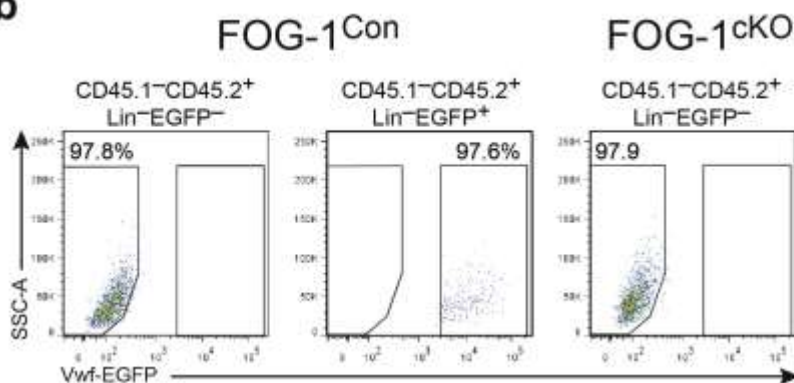

Supplementary Fig. 7: Isolation of  $CD45.1^{-}CD45.2^{+}Lin^{-}Vwf^{-}$  and  $Vwf^{+}$  cells from  $Vwf$ -FOG-1<sup>Con</sup> and  $Vwf$ -FOG-1<sup>cKO</sup> transplanted mice.

**a)** As indicated  $CD45.1^{-}CD45.2^{+}Lin^{-}Vwf^{-}$  and  $Vwf^{+}$  cells were sorted from  $Vwf$ -FOG-1<sup>Con</sup> and  $CD45.1^{-}CD45.2^{+}Lin^{-}Vwf^{-}$  cells from  $Vwf$ -FOG-1<sup>cKO</sup> transplanted mice.

**b)** Each isolated fraction was re-analyzed for sort purity before being competitively transplanted into secondary recipients using cell doses proportional to their abundance in the primary recipients (i.e. maintaining the ratio of  $Vwf^{+}$  and  $Vwf^{-}$  cells). Data are from 2 independent experiments.
